# Supplementary material for: DOCK2 sets the threshold for entry into the virtual memory CD8+ T cell compartment by negatively regulating tonic TCR triggering
Source: bioRxiv or medRxiv preprint supplement (doi:10.1101/582486), 2019-03-20

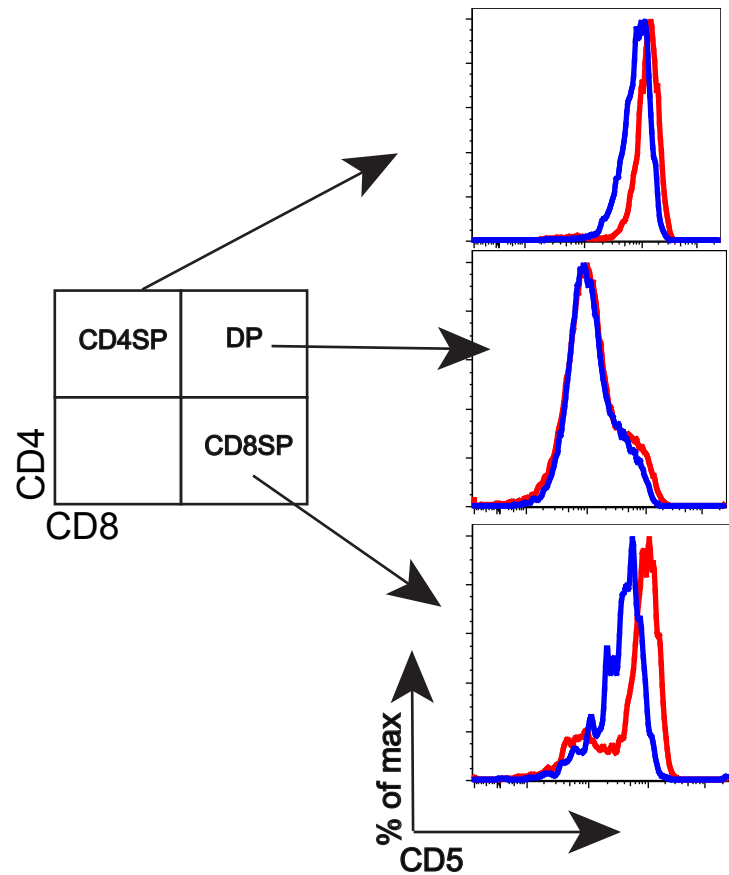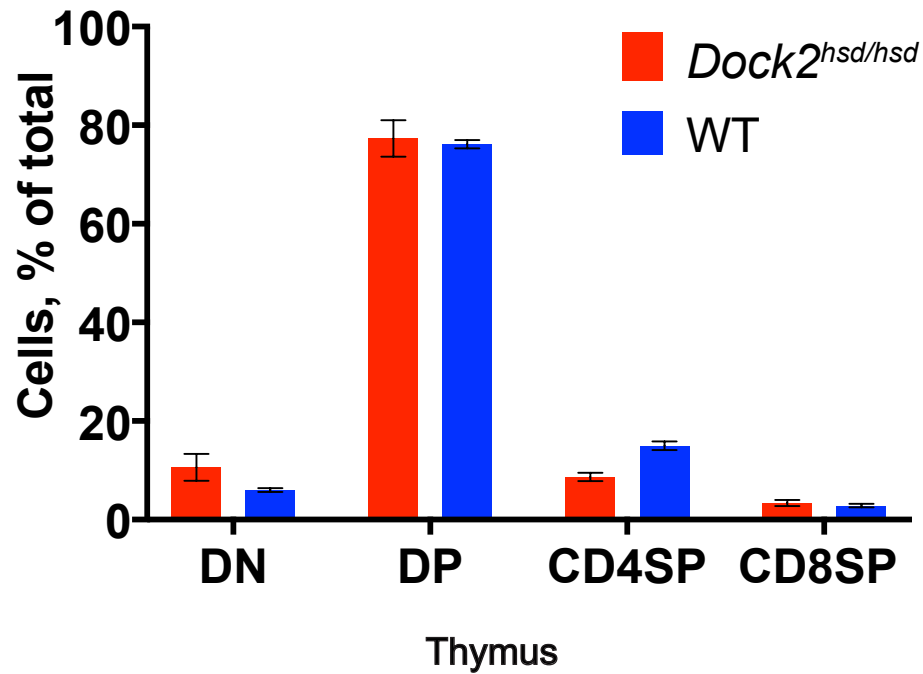

Supplement: Supplementary file [file media-2.pdf]
